# Supplementary material for: Duration of Ice Hockey Play and Chronic Traumatic Encephalopathy
Source: PubMed Central journal article supplement (PMC11618473; doi:10.1001/jamanetworkopen.2024.49106), 2024-12-04
Supplement: jamanetwopen-e2449106-s002.pdf [file jamanetwopen-e2449106-s002.pdf]

## Data Sharing Statement

Abdolmohammadi. Duration of Ice Hockey Play and Chronic Traumatic Encephalopathy. *JAMA Netw Open*. Published online December 4, 2024. doi:10.1001/jamanetworkopen.2024.49106

### Data

**Data available:** Yes

**Data types:** Deidentified participant data, Data dictionary

**How to access data:** Data can be accessed on FITBIR: <https://fitbir.nih.gov>. In addition, requests can be made via the BU ADRC:

<https://wwwru.bumc.bu.edu/BUADC/RequestClinicalData.aspx>

**When available:** With publication

### Supporting Documents

**Document types:** None

### Additional Information

**Who can access the data:** Data will be made available to approved principal investigators.

**Types of analyses:** Analyses should have deliverables such as manuscripts, grants and/or training.

**Mechanisms of data availability:** For access directly from BU ADRC, a proposal should be submitted through the website and approved by study leaders. A data sharing fee may be assessed to cover support costs.
